# Supplementary material for: Work Outcomes after Intensity-Modulated Proton Therapy (IMPT) versus Intensity-Modulated Photon Therapy (IMRT) for Oropharyngeal Cancer
Source: PubMed Central journal article supplement (PMC8270077; doi:10.14338/ijpt-20-00067.1), 2021-06-25

**eFigure 1. Patient enrollment in the parent randomized clinical trial and number of voluntary participants in the patient reported work outcomes survey, by treatment group**

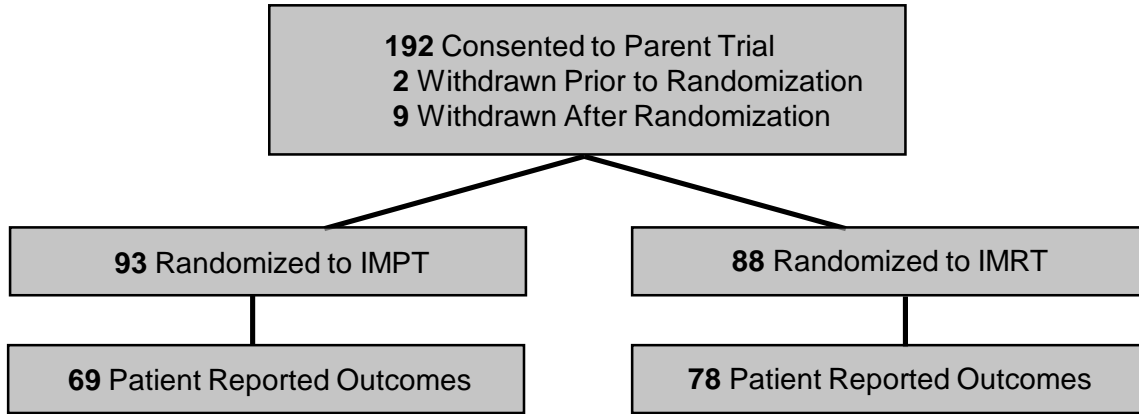

Supplement: ijpt-08-01-21_s01.pdf [file ijpt-08-01-21_s01.pdf]
